# Supplementary material for: Radiographical efficacy of systemic treatment for bone metastasis from renal cell carcinoma
Source: PubMed Central journal article supplement — Oncol Lett. 2020 Sep 21;20(5):267. doi: 10.3892/ol.2020.12130 (PMC7517538; doi:10.3892/ol.2020.12130), 2020-09-21
Supplement: Supplementary_Data.pdf [file Supplementary_Data.pdf]

| Response            | Criteria                                                                                                                                                                                                                                                                                                                                                                                                                                                                                                                                                                                                                              |
|---------------------|---------------------------------------------------------------------------------------------------------------------------------------------------------------------------------------------------------------------------------------------------------------------------------------------------------------------------------------------------------------------------------------------------------------------------------------------------------------------------------------------------------------------------------------------------------------------------------------------------------------------------------------|
| Complete response   | <ul style="list-style-type: none"> <li>• Disappearance of hot spots or tumor signal on SS, CT or MRI</li> <li>• Osteolytic lesion                             <ul style="list-style-type: none"> <li>◦ Complete sclerotic fill-in of lytic lesions on X-rays or CT</li> </ul> </li> <li>• Osteoblastic lesion                             <ul style="list-style-type: none"> <li>◦ Normalization of lesions on X-rays or CT</li> </ul> </li> </ul>                                                                                                                                                                                    |
| Partial response    | <ul style="list-style-type: none"> <li>• Regression of measurable lesion on X-Ray, CT or MRI</li> <li>• Regression of lesion on SS (excluding rapid regression)</li> <li>• Osteolytic lesion                             <ul style="list-style-type: none"> <li>◦ Sclerotic rim about osteolytic lesion or sclerosis of previously undetected lesion on X-rays or CT</li> <li>◦ Partial sclerotic fill-in of osteolytic lesion on X-rays or CT</li> </ul> </li> <li>• Osteoblastic lesion                             <ul style="list-style-type: none"> <li>◦ Decrease in osteoblastic lesion on X-rays or CT</li> </ul> </li> </ul> |
| Stable disease      | <ul style="list-style-type: none"> <li>• No change in measurable lesion on X-rays, CT or MRI</li> <li>• No change in osteoblastic or osteolytic lesion on X-rays, CT or MRI</li> <li>• No new lesion on X-rays, SS, CT or MRI</li> </ul>                                                                                                                                                                                                                                                                                                                                                                                              |
| Progressive disease | <ul style="list-style-type: none"> <li>• Increase in size of any existing measurable lesions on X-rays, CT or MRI</li> <li>• New lesion on X-rays, SS (excluding flares), CT or MRI</li> <li>• Increase in activity on SS (excluding flares) of osteoblastic or osteolytic lesion on XR or CT</li> </ul>                                                                                                                                                                                                                                                                                                                              |

SS, skeletal scintigraph.
